# Supplementary material for: C(P)42+: a viable planar tetracoordinate carbon species
Source: Royal Society of Chemistry journal article supplement (doi:10.1039/d4cp02205j), 2024-01-01
Supplement: d4cp02205j1.pdf [file d4cp02205j1.pdf]

**Supporting Information**

**Of**

**$C(P)_4^{2+}$ : A Viable Planar Tetracoordinate Carbon Species**

Kangkan Sarmah,<sup>a</sup> Farnaz Yashmin,<sup>a</sup> Dr. Amlan J. Kalita,<sup>a</sup> Kriti Haloi,<sup>a</sup> Surjata Devi,<sup>a</sup>

Priyakshi Barman,<sup>a</sup> Dr. Lakhya J. Mazumder,<sup>a</sup> and Dr. Ankur K. Guha\*<sup>a</sup>

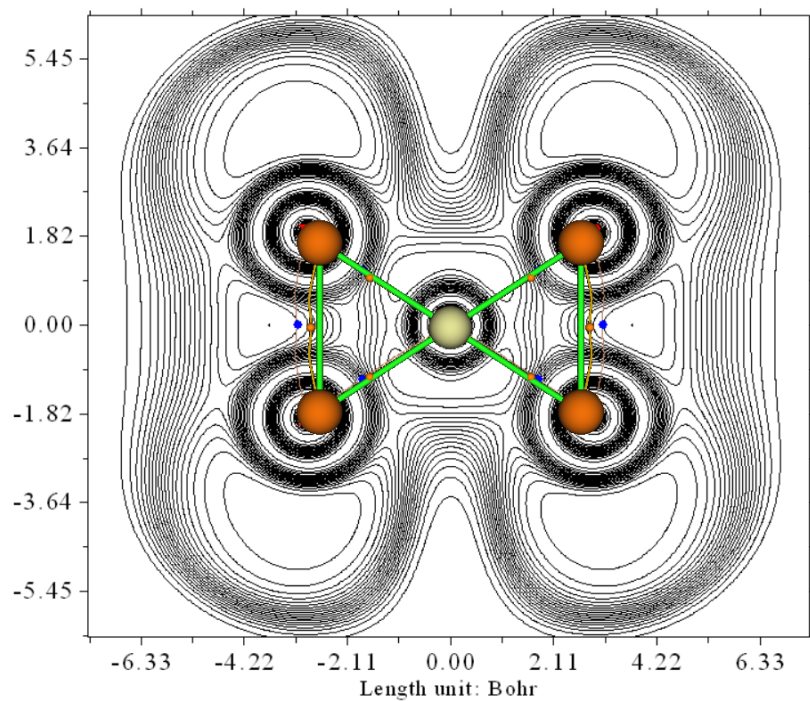

**Fig S1.** 2D plot of Laplacian of electron density of the  $D_{2h}$  structure of  $C(P)_4^{2+}$  cluster. Bond critical points are shown in orange dots.

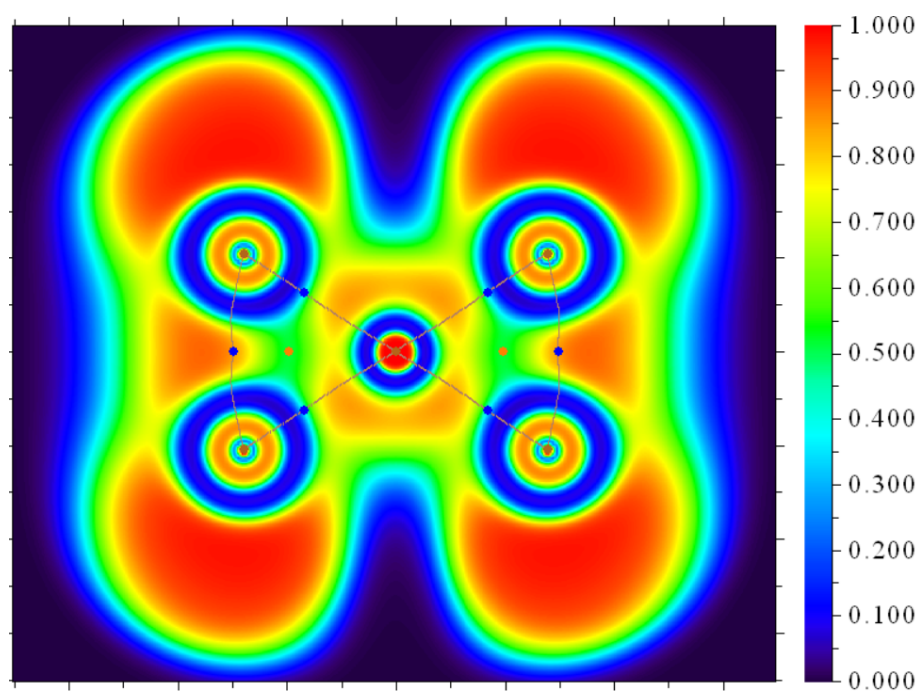

**Fig S2.** 2D plot of electron localization function.

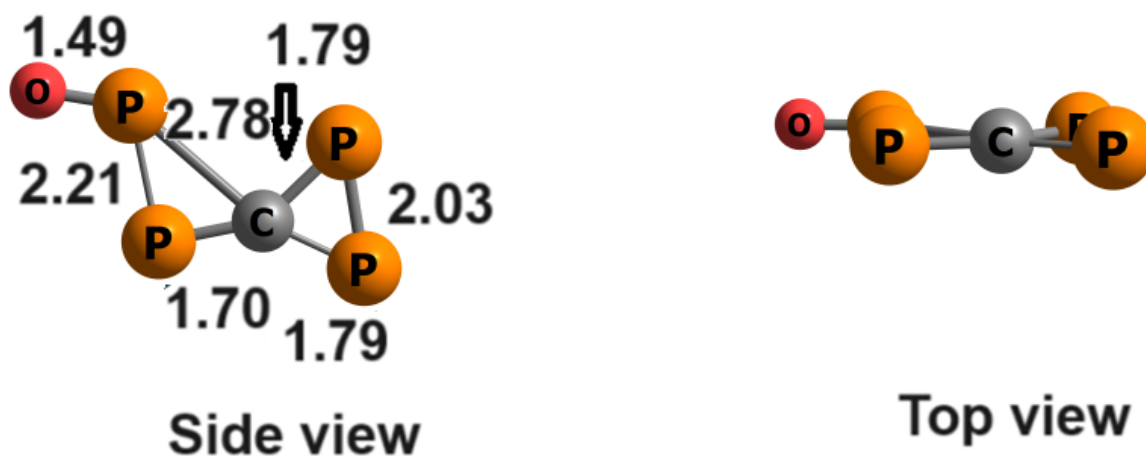

**Fig S3.** Side and top view of the  $C(P_4)^{2+}O^{2-}$  ionic pair. Bond lengths are in Å.

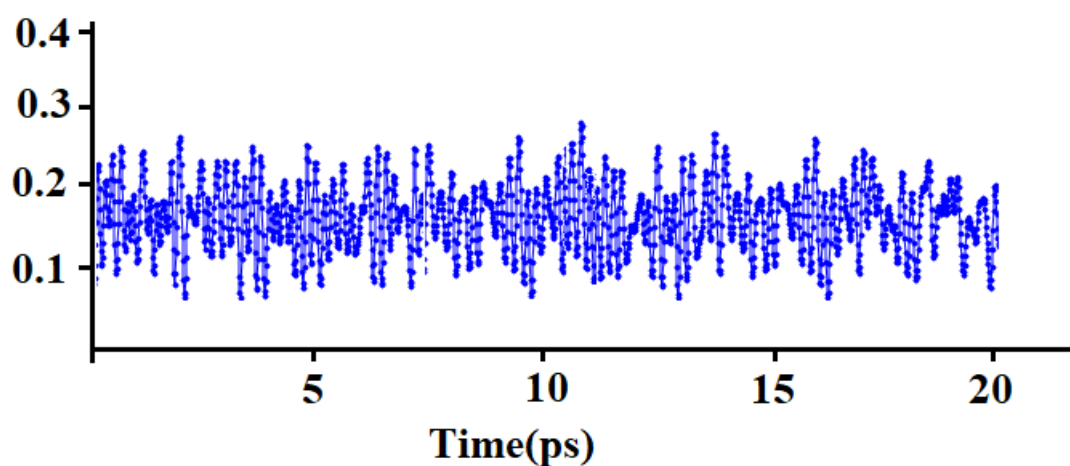

**Fig S4.** RMSD (Å) versus time (ps) plot of the Born-Oppenheimer molecular dynamics (BOMD) simulation for the ptC structure of  $C(P_4)^{2+}O^{2-}$  ionic pair for 20 ps at 298 K with a time frame of 0.5 fs.

Cartesian coordinates of all the molecules along with the total energy,  $E$  (a.u) calculated at CCSD(T)/aug-cc-pVTZ//TPSSh/def2-TZVP level. Lowest vibrational frequency is also mentioned.

$^{13}C$

Lowest vibrational frequency=  $238\text{ cm}^{-1}$

**E= -1400.89025**

|    |              |              |              |
|----|--------------|--------------|--------------|
| 6  | -0.000009000 | -0.000187000 | -1.016227000 |
| 15 | 0.000092000  | -1.105931000 | 0.736015000  |
| 15 | -1.622642000 | -0.000219000 | -0.532533000 |
| 15 | -0.000095000 | 1.106316000  | 0.735540000  |
| 15 | 1.622649000  | -0.000091000 | -0.532531000 |

**<sup>1</sup>D**

**Lowest Vibrational Frequency= 60 cm<sup>-1</sup>**

**E= -1400.86076**

|    |              |              |              |
|----|--------------|--------------|--------------|
| 6  | -0.000007000 | 0.000005000  | 0.000005000  |
| 15 | 1.561240000  | 1.009758000  | 0.000144000  |
| 15 | -1.561234000 | -1.009761000 | 0.000144000  |
| 15 | -1.561232000 | 1.009765000  | -0.000145000 |
| 15 | 1.561229000  | -1.009763000 | -0.000145000 |

**<sup>1</sup>E**

**Lowest vibrational frequency= 12 cm<sup>-1</sup>**

**E= -1400.84554**

|    |              |              |              |
|----|--------------|--------------|--------------|
| 6  | 0.606021000  | -0.000159000 | 0.002990000  |
| 15 | -3.046869000 | 0.000008000  | -0.006266000 |
| 15 | 1.975668000  | -1.066952000 | -0.002260000 |
| 15 | 1.975335000  | 1.067107000  | -0.002259000 |
| 15 | -1.146543000 | -0.000099000 | 0.009590000  |

**<sup>1</sup>F**

**Lowest vibrational frequency= 116 cm<sup>-1</sup>**

**E= -1400.84271**

|    |              |              |              |
|----|--------------|--------------|--------------|
| 6  | -0.919358000 | 0.000732000  | -0.148666000 |
| 15 | 0.461764000  | -1.201563000 | -0.431891000 |

|    |              |              |              |
|----|--------------|--------------|--------------|
| 15 | 0.462428000  | 1.201848000  | -0.431488000 |
| 15 | 1.900866000  | -0.000477000 | 0.599336000  |
| 15 | -2.457315000 | -0.000100000 | 0.323509000  |

### **<sup>1</sup>G**

**Lowest vibrational frequency= 30 cm<sup>-1</sup>**

**E= -1400.81904**

|    |              |              |              |
|----|--------------|--------------|--------------|
| 6  | -1.676610000 | 0.063035000  | -0.051550000 |
| 15 | -3.135158000 | -0.563405000 | -0.113530000 |
| 15 | 1.318618000  | -0.192698000 | 0.693858000  |
| 15 | -0.378205000 | 1.098866000  | -0.091979000 |
| 15 | 2.865389000  | -0.367977000 | -0.467729000 |

### **<sup>3</sup>H**

**Lowest vibrational frequency= 148 cm<sup>-1</sup>**

**E= -1400.81439**

|    |              |              |              |
|----|--------------|--------------|--------------|
| 6  | 0.396197000  | 0.000101000  | 0.239186000  |
| 15 | -2.508805000 | -0.000255000 | -0.711097000 |
| 15 | 1.759009000  | -1.040193000 | -0.188177000 |
| 15 | 1.759098000  | 1.040023000  | -0.188760000 |
| 15 | -1.167781000 | 0.000386000  | 0.992360000  |

### **<sup>3</sup>I**

**Lowest vibrational frequency= 148 cm<sup>-1</sup>**

**E= -1400.81034**

|    |              |              |              |
|----|--------------|--------------|--------------|
| 6  | 0.000158000  | -0.758578000 | -0.000216000 |
| 15 | 1.675986000  | -0.967185000 | -0.186630000 |
| 15 | -1.060839000 | 1.118971000  | -0.294937000 |
| 15 | -1.675611000 | -0.967569000 | 0.186708000  |
| 15 | 1.060400000  | 1.119215000  | 0.294945000  |

### **<sup>3</sup>J**

**Lowest vibrational frequency= 57 cm<sup>-1</sup>**

**E= -1400.79688**

|    |              |              |              |
|----|--------------|--------------|--------------|
| 6  | -0.965538000 | 0.000241000  | 0.034101000  |
| 15 | 0.417366000  | -1.209514000 | -0.055292000 |
| 15 | 0.417476000  | 1.209596000  | -0.055283000 |
| 15 | 2.152469000  | -0.000113000 | 0.065522000  |
| 15 | -2.601095000 | -0.000066000 | 0.031413000  |

**TS<sub>CD</sub>**

**Lowest vibrational frequency= -228 cm<sup>-1</sup>**

**E= -1400.83752**

|    |              |              |              |
|----|--------------|--------------|--------------|
| 6  | 0.792282000  | 0.000340000  | -0.135354000 |
| 15 | -0.555704000 | 1.182489000  | -0.604253000 |
| 15 | -1.541994000 | -0.000281000 | 0.922909000  |
| 15 | -0.555379000 | -1.182317000 | -0.604584000 |
| 15 | 2.336164000  | -0.000026000 | 0.340069000  |

**TS<sub>DE</sub>**

**Lowest vibrational frequency= -130 cm<sup>-1</sup>**

**E= -1400.83755**

|    |              |              |              |
|----|--------------|--------------|--------------|
| 6  | -0.305290000 | -0.119393000 | 0.152793000  |
| 15 | 2.072221000  | 0.577723000  | -0.590114000 |
| 15 | -1.547762000 | 1.069721000  | 0.386850000  |
| 15 | -1.741507000 | -0.839481000 | -0.535565000 |
| 15 | 1.339163000  | -0.760205000 | 0.677711000  |

**P<sub>4</sub>C<sup>2+</sup>O<sup>2-</sup> ionic pair**

**Lowest vibrational frequency= 44 cm<sup>-1</sup>**

|    |              |              |              |
|----|--------------|--------------|--------------|
| 6  | -0.755474000 | 0.373239000  | -0.000017000 |
| 15 | -2.541770000 | 0.475753000  | -0.000044000 |
| 15 | 1.878199000  | -0.547522000 | -0.000002000 |

|    |              |              |              |
|----|--------------|--------------|--------------|
| 15 | 0.668070000  | 1.307489000  | 0.000022000  |
| 15 | -1.480319000 | -1.265915000 | -0.000005000 |
| 8  | 3.333767000  | -0.223313000 | 0.000067000  |
